# Supplementary material for: Human DNA polymerase α in binary complex with a DNA:DNA template-primer
Source: PubMed Central journal article supplement (PMC4817131; doi:10.1038/srep23784), 2016-04-01
Supplement: srep23784-s1.pdf [file srep23784-s1.pdf]

# **Human DNA polymerase $\alpha$ in binary complex with a DNA:DNA template-primer**

## **Supplementary information**

Javier Coloma<sup>1</sup>, Robert E. Johnson<sup>2</sup>, Louise Prakash<sup>2</sup>, Satya Prakash<sup>2</sup>, Aneel K. Aggarwal<sup>1</sup>.

<sup>1</sup>Department of Structural & Chemical Biology  
Mount Sinai School of Medicine  
Box 1677  
1425 Madison Avenue  
New York, NY 10029, USA.

<sup>2</sup>Department of Biochemistry and Molecular Biology  
301 University Boulevard  
University of Texas Medical Branch  
Galveston, TX 77555-1061, USA

\* Correspondence: [Aneel.Aggarwal@mssm.edu](mailto:Aneel.Aggarwal@mssm.edu)

Supplementary figure 1

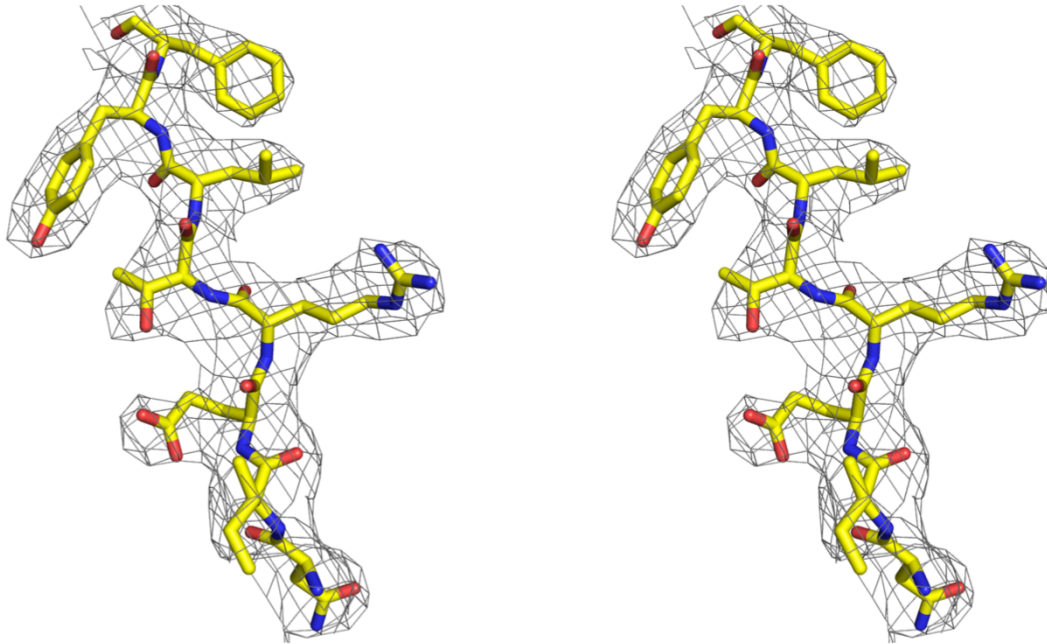

**Figure S1. Stereo image of hPol $\alpha$  residues 382 to 389.** The 2Fo-Fc electron density map at 3.3Å resolution is displayed at contour level of 1.0 $\sigma$ . The map was generated by Phenix and displayed using Coot. Protein is drawn as sticks and the electron density maps are drawn as mesh.

Supplementary figure 2

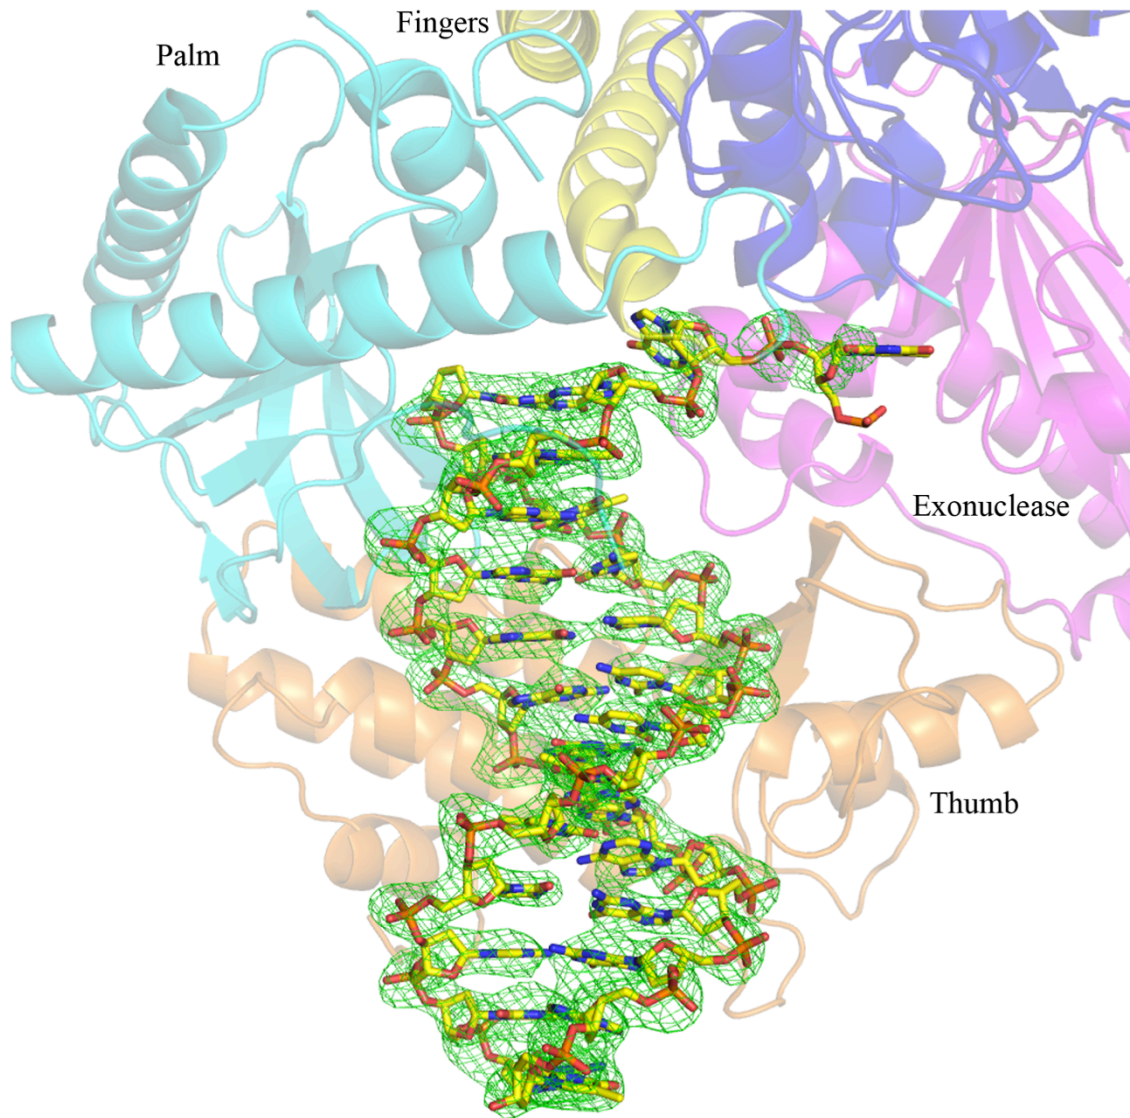

**Figure S2. Simulated annealing Fo-Fc omit map.** The omit map (contoured at  $3\sigma$ ) was generated with the DNA atoms (chains B and C) omitted and is represented as a green mesh. The hPol $\alpha$  palm, fingers, thumb, exonuclease and N-terminal domains are shown in cyan, yellow, orange, magenta and blue respectively. DNA is shown in elemental colors. There was no density for the first three nucleotides of the template strand; only nucleotides 4-18 were modeled.

### Supplementary figure 3

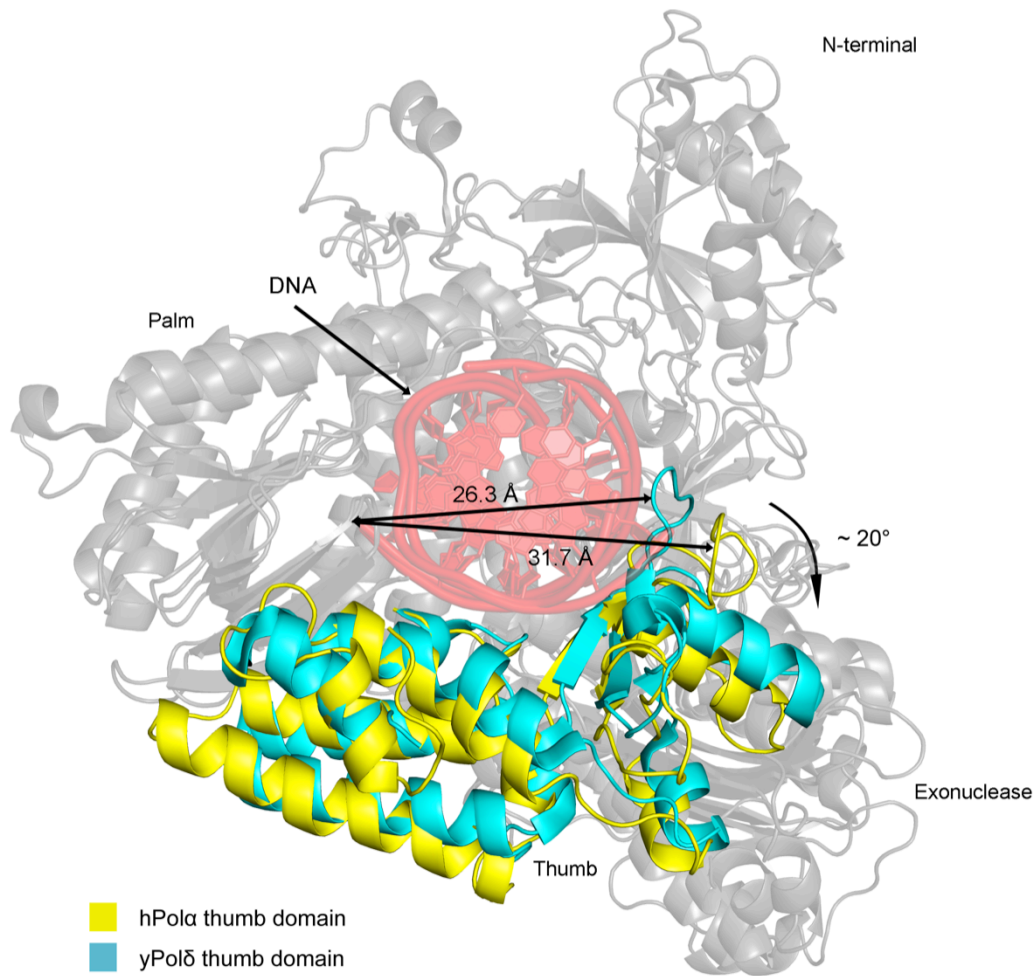

**Figure S3. Comparison of DNA binding cavity in hPol $\alpha$  and yPol $\delta$ .** The hPol $\alpha$  binary and yPol $\delta$  ternary structures were superposed to compare their DNA binding cavities. All proteins domains except the thumbs are shown in gray. The DNA base pairs in contact with the proteins are shown (red). The hPol $\alpha$  thumb domain is colored yellow and the yPol $\delta$  thumb domain is colored cyan. The distances between Lys1051 and Asp1148 in hPol $\alpha$  and the homologous amino acids in yPol $\delta$ , Lys812 and Asn899 are marked with black arrows. Palm, N-terminal, endonuclease and thumb domains are labeled.
